26. McCann SK, Irvine C, Mead GE, Sena ES, Currie GL, Egan KE, Macleod MR, Howells DW: Efficacy of antidepressants in animal models of ischemic stroke: A systematic review and meta-analysis. *Stroke* 2014; 45:3055–63
27. Pedder H, Vesterinen HM, Macleod MR, Wardlaw JM: Systematic review and meta-analysis of interventions tested in animal models of lacunar stroke. *Stroke* 2014; 45:563–70
28. O'Collins VE, Macleod MR, Donnan GA, Howells DW: Evaluation of combination therapy in animal models of cerebral ischemia. *J Cereb Blood Flow Metab* 2012; 32:585–97
29. Ioannidis JP: Why most published research findings are false. *PLoS Med* 2005; 2:e124
30. Kitano H: Biological robustness. *Nat Rev Genet* 2004; 5:826–37
31. Ellis GF: Top-down causation and emergence: Some comments on mechanisms. *Interface Focus* 2012; 2:126–40
32. Shi H, Sun BL, Zhang J, Lu S, Zhang P, Wang H, Yu Q, Stetler RA, Vosler PS, Chen J, Gao Y: miR-15b suppression of Bcl-2 contributes to cerebral ischemic injury and is reversed by sevoflurane preconditioning. *CNS Neurol Disord Drug Targets* 2013; 12:381–91

## ANESTHESIOLOGY REFLECTIONS FROM THE WOOD LIBRARY-MUSEUM

### From Basket to Casket? The Basket Bearer of Belladonna for Liebig Company Processing

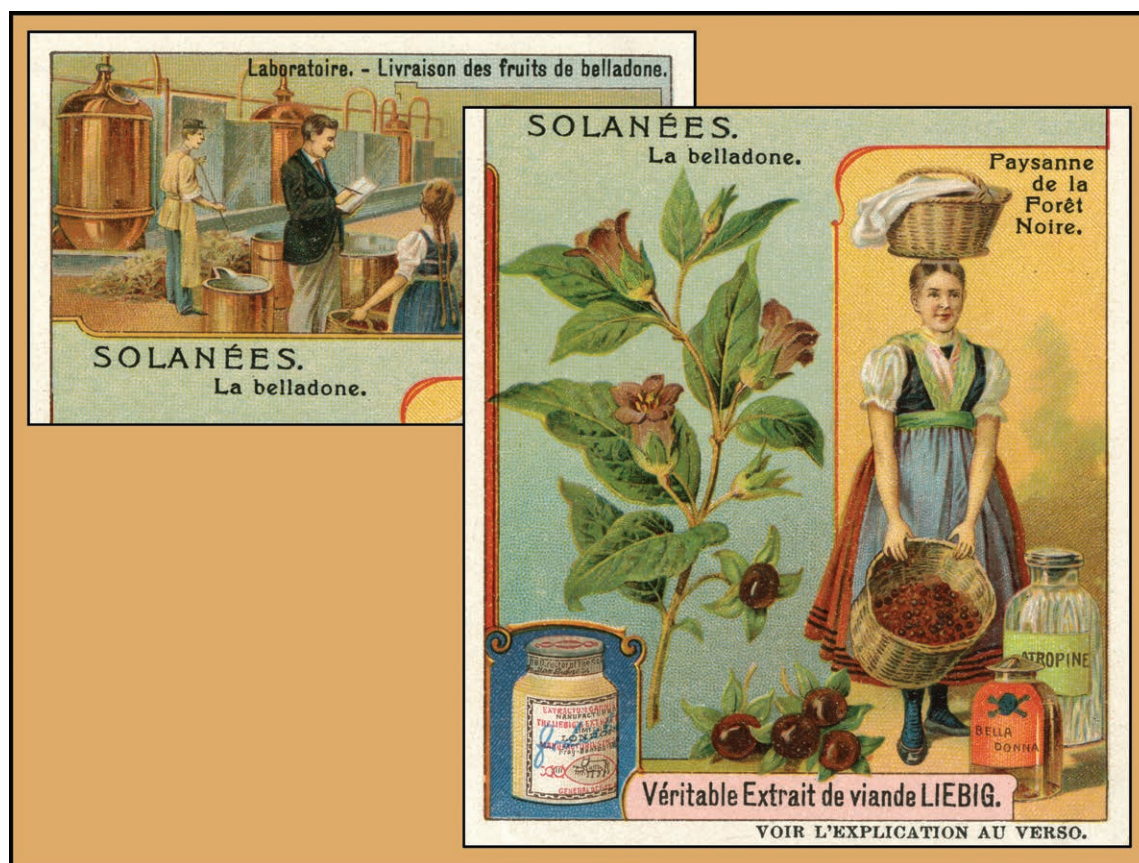

According to this French-language version of a trade card distributed by a company inspired by chloroform discoverer Justus von Liebig (1803 to 1873), fruits of the deadly nightshade or belladonna plant (*Atropa belladonna*) were at one time plucked in southwestern Germany by “a peasant of the Black Forest.” As long as she never sampled more than nine of the sweet berries of belladonna, the woman would arrive, perhaps disoriented but safely to the manufacturing “laboratory...[with a] delivery of belladonna fruit.” (Eating as few as ten berries could have poisoned her to death.) From the baskets she and others bore on their heads and in their hands, the Liebig Company would ferment a mash of the berries for ethanolic extraction of atropine from this poisonous member of the Solanaceae family of plants. Atropine is still used today to accelerate the rhythm of dangerously slowing hearts. (Copyright © the American Society of Anesthesiologists' Wood Library-Museum of Anesthesiology.)

George S. Bause, M.D., M.P.H., Honorary Curator and Laureate of the History of Anesthesia, Wood Library-Museum of Anesthesiology, Schaumburg, Illinois, and Clinical Associate Professor, Case Western Reserve University, Cleveland, Ohio. UJYC@aol.com.
